# Supplementary material for: Loss of the Synaptic Vesicle Protein SV2B Results in Reduced Neurotransmission and Altered Synaptic Vesicle Protein Expression in the Retina
Source: PubMed Central journal article supplement (PMC2667261; doi:10.1371/journal.pone.0005230), 2009-04-17
Supplement: pone.0005230.s002.pdf [file pone.0005230.s002.pdf]

### Anti-Synaptotagmin 1 (p65) mAb

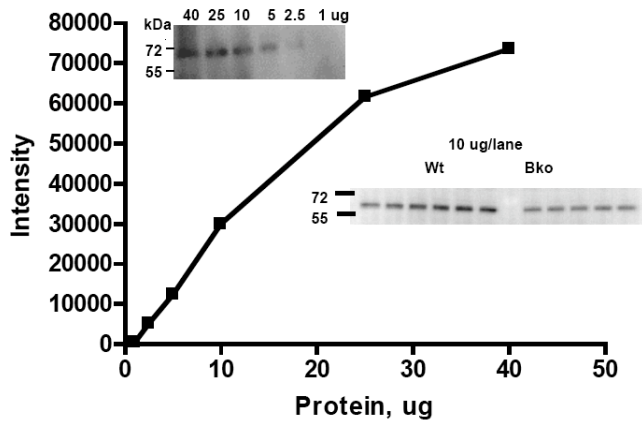

### Anti-Synaptophysin (p38) mAb

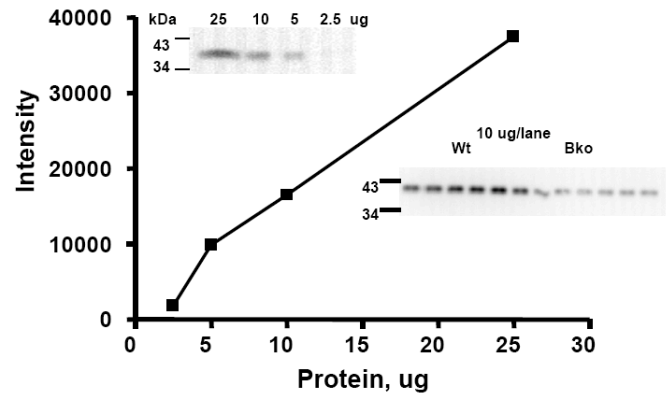

### Anti-Vamp2 mAb

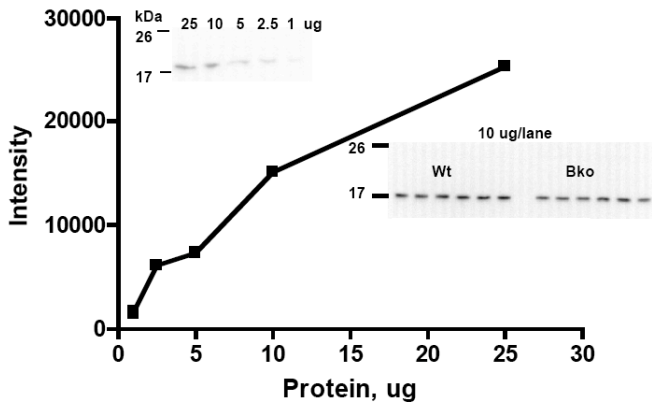

### Anti-GAPDH mAb

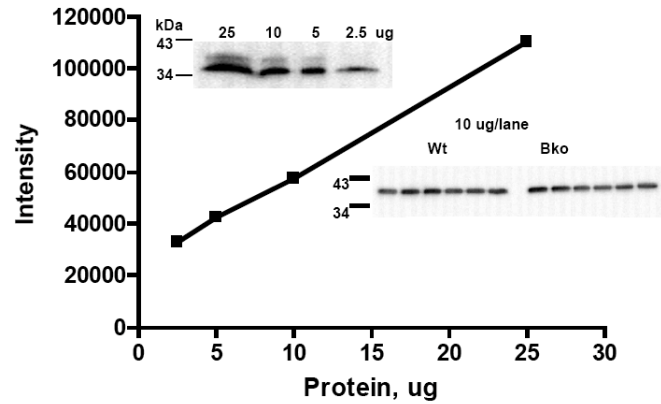

### Anti-Synaptotagmin (p65) pAb

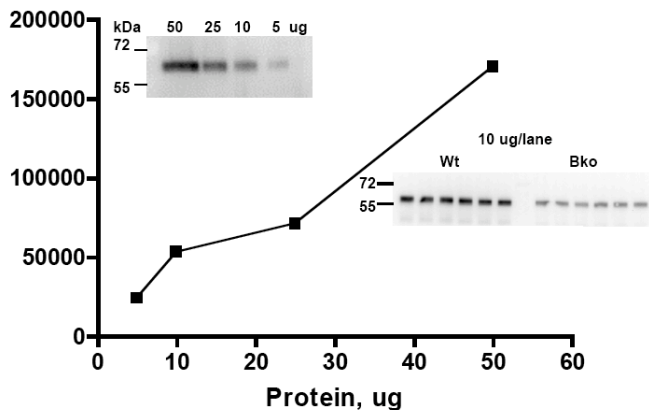

### Anti-Vglut1 mAb

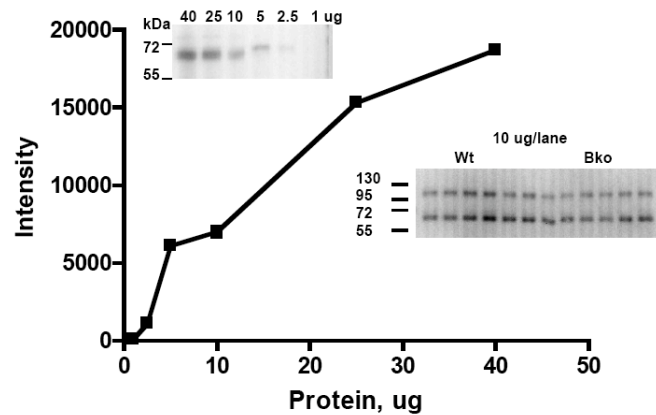

### Supplemental Figure 1: Calibration blots and Western data.

Shown are blots and graphs of the signal intensity obtained from increasing amounts of postnuclear supernatant from wild-type eye probed with the indicated antibody. Also shown are representative quantitative blots showing wild-type and SV2B KO sample replicates.
